# Supplementary material
Source: publisher figshare collection journal article supplement (https://diabetesjournals.figshare.com/articles/dataset/_/28444532)
Supplement: Supplementary file 1 [file 1]

## Sheet: association
	coefficient	p value	coefficient	p value
latent variables:	metabolic variation EFA1		metabolic variation EFA2
Triglycerides	0.096	0.002	0.113	0.325
LDL	4.586	0	0	0.099
HOMA.IR	-0.004	0.37	0.154	0.042
CRP	0.004	0.561	0.586	0
Age	-0.003	0.642	0.482	0.001
BMI	-0.001	0.771	0.93	0
	inflammation
ELA2	-0.552	0.003
CD14	0.682	0
LBP	0.481	0.002
	gut microbiota
clustr1	0.156	0.016
clustr2	-0.32	0
fecal calprotectin	-0.315	0.055
stool consistency	0.436	0.002
regression:	metabolic variation EFA1		metabolic variation EFA2
gut microbiota	-0.052	0	0.268	0.166
inflammation	-0.008	0.599	0.55	0.023
counts: female	-0.006	0.351	0.089	0

## Sheet: covariance
		coefficient	p value
Calprotectin_plasma
	ELA2	0.263	0.063
	MPO	0.971	0
CRP
	LBP	0.309	0.017
Cholesterol
	Triglycerides	0.548	0
	LDL	0.846	0
HOMA-IR
	WBISI	-0.766	0
	IGI	-0.126	0.086
counts
	Stool consistency	-0.223	0.078
	Calprotectin_fecal	-0.114	0.427
gut microbiota
	inflammation	0.142	0.543
	counts: female	0.064	0
metabolic variation EFA1
	metabolic variation EFA2	-0.02	0.088
