# Supplementary material
Source: publisher figshare collection journal article supplement (https://diabetesjournals.figshare.com/articles/dataset/_/28444532)
Supplement: Supplementary file 2 [file 1]

Online supplemental materials

*Anthropometric measurements*

A standard, calibrated scale and wall-mounted stadiometer was used to measure weight and height, respectively. Body Mass Index (BMI) was calculated as weight (kg)/height (m)<sup>2</sup>. Waist circumference was measured to the nearest 0.1 cm at the superior edge of the iliac crest using the Gulick II measuring tape. Three trials of the above measurements were completed, and the mean measurements were used for analyses. Participants are included with BMI  $\geq$ 97th percentile on age-and-sex-standardised WHO growth chart<sup>1</sup>, and excluded if with impaired glucose tolerance or having taken antibiotics in the previous three months.

*Tanner Stage Assessment*

Participants completed a Pubertal Self-Assessment Tool to obtain Tanner Staging <sup>2</sup>.

*Oral Glucose Tolerance Test, Metabolic and Plasma Lipids Assessment:*

Blood draws were completed via an intravenous catheter in the antecubital fossa after anthropometrics measurements. All measurements were taken after an 8-14 hour overnight fast. Water was consumed up to 2 hours before the study visit. Baseline fasting samples were obtained (starting time: 0 minutes), followed by an Oral Glucose Tolerance Test (OGTT) where participants consumed a standard glucose-containing drink in 75g GlucoDex bottle (Teva Canada) with a dose of 1.75g/kg to a max of 75g. Venous blood samples were obtained at 30, 60, 90 and 120 minutes after the drink was consumed.

Collected blood samples were tested for (reference range indicated where available):  
fasting glucose (3.9-6.0 mmol/L), fasting insulin (15-345 pmol/L), glycated hemoglobin

(HbA1c) (<6.0%), C-Reactive Protein (CRP) (0.1-1.7mg/L), cholesterol (<4.40 mmol/L), triglycerides (<1.5 mmol/L), high-density lipoprotein (HDL-C) (>1.2 mmol/L), low-density lipoprotein (LDL-C) (<2.6 mmol/L). Insulin and glucose levels taken from the OGTT were used to calculate the following measures of pancreatic  $\beta$  cell function: HOMA-IR (glucose (mmol) x insulin (uIU/ml)/22.5;  $\leq 3.22$  for Tanner stage 2-3,  $\leq 2.91$  for Tanner stage 4-5) = Fasting Insulin [uU/mL] x Fasting Glucose; Whole Body Insulin Sensitivity Index (WBISI =  $10,000 / \sqrt{[(\text{Fasting Glucose} \times \text{Fasting Insulin}) \times (\text{mean glucose} \times \text{mean insulin})]}$ ), validated in adults and children<sup>3</sup>; and insulinogenic index (IGI =  $\Delta [\text{uU/mL}] (0-30 \text{ min}) / \Delta \text{glucose} [\text{mmol/L}] (0-30 \text{ min})$ ) as measure of early insulin secretion and  $\beta$  cell function.

Remaining blood samples from clinical measurements were transported to the laboratory on ice and fractionated into PBMC and plasma using Ficoll-Hypaque Plus Density Gradient Media (Cytiva, USA) following manufacturer's instructions on the same day. 29 blood samples were processed on the same day within 5 hours of reception, while remaining samples from the cohort were stored at 4°C overnight and processed the following day. Recovered PBMC were counted using trypan blue and viably frozen at  $1-10 \times 10^6$  cells/mL in 1mL of freezing media containing 10% DMSO in FBS, and stored in liquid nitrogen until analysis. Plasma fractions were divided into 1mL aliquots and stored at -80°C until analysis.

#### *Quantification of plasma neutrophil-associated proteins, LPS-binding proteins, and fecal calprotectin*

Soluble proteins in plasma or fecal samples were quantified using enzyme-linked immunosorbent assay (ELISA) through commercially available kits (Reagent Table).

#### *Stool Sample Collection and Processing*

Individual stool samples were available for 53 of the 56 participants. Stool samples were collected either during a clinic visit, or at home one day before a visit and transported to the hospital on ice and stored at -80°C. Frozen stool samples were separated into aliquots ~ 0.2g (wet weight) on dry ice for absolute bacterial quantification, fecal DNA extraction and water content measurement, respectively, and the remaining samples at - 80°C until analysis.

### *16S rRNA Gene Sequencing Analysis*

Stool genomic DNA was extracted with the QIAamp Fast DNA Stool Mini Kit (QIAGEN, Canada) following manufacturer's instructions. Extracted DNA concentrations were quantified by a NanoDrop 2000C spectrophotometer (Thermo Fisher Scientific, USA) in lab and a Qubit Fluorometer 2.0 (Invitrogen, USA) at the Centre for Applied Genomics (TCAG) at the Hospital for Sick Children. DNA samples were diluted to 5ng/nL based on the fluorometric assay and sent for library preparation. Library preparation and sequencing were performed at the University of Colorado, Anschutz Medical Campus (Aurora, USA). The V3 and V4 hypervariable regions of the 16S rRNA gene were amplified with previously published F338/R806 primers and sequenced on a MiSeq platform (Illumina, San Diego, CA, USA)<sup>4</sup>. Overlapping paired-end reads were processed with a DADA2<sup>5</sup> pipeline in R and unique ASVs were assigned a taxonomy based on SILVA v138.1 rRNA database <sup>6,7</sup> updated Mar 10, 2021 with a minimum 95% sequence overlap and 90% bootstrap confidence interval. The changes to phylum name advised by International Committee on Systematics of Prokaryotes<sup>8</sup> are currently not available in SILVA <sup>6,7</sup>. Therefore, the taxa reported in this manuscript were assigned based previous prokaryotic nomenclature rules, with manual change to new phyla for display based on The List of Prokaryotic names with Standing in Nomenclature<sup>9</sup>. The first mention of a phylum in the manuscript shows both the

previous name and updated name to avoid confusion. 16S rRNA gene sequencing cannot resolve between *Escherichia coli* and *Shigella* due to high genetic similarity<sup>10,11</sup>, and was assigned to both based on reference database. In main text, we refer to this taxon as *Escherichia coli*.

### *Fecal-derived Bio-reactor Culture*

Fecal samples were inoculated and maintained in continuous-flow bioreactor cultures as previously published<sup>12,13</sup>. Aliquots of fecal inoculum were normalized by absolute numbers of bacteria/dry g stool per group (high biomass:  $2.9 \times 10^{11}$  bacteria/aliquot; low biomass:  $2.7 \times 10^{10}$  bacteria/aliquot – based on group median values). Briefly, partially thawed fecal samples (2-8g wet weight) were transferred into sterile bags containing 10mL of sterile degassed chemostat media and homogenized by hand to form slurries. Each fecal slurry was used to inoculate a 500mL Multifors bioreactor system vessel (Infors AG, Bottmingen/Basel, Switzerland) already containing 490 mL sterile degassed chemostat media at 37°C, pH 7, and stirring at 50 rpm. Vessels were maintained under anaerobic, batch fermentation conditions for 24h before switching to continuous fermentation conditions (on day one). Bioreactor media was fed at a flow rate of 500 mL/day to ensure a 24h turnover of vessel contents. Vessels were maintained for 28 days, but analysis done on samples collected in the first 18 days.

### *CyTOF Immune Profiling of PBMC*

Antibodies were purchased from various vendors (Reagent Table); most were metal tagged in-house using MaxPar X8 labelling kits (Standard BioTools). The optimal staining concentration for each antibody was pre-determined by evaluating a signal-to-noise metric over a 3-fold serial dilution series (range 1/30-1/2430) on healthy donor PBMC or other cell source containing

subsets known to be positive and negative for each marker. Frozen PBMC were quickly thawed in 37°C water bath and immediately added dropwise to 8mL of pre-warmed tissue culture medium (TCM: RPMI-1640 with GlutaMAX, 10% fetal bovine serum (FBS), 0.1 mM NEAA, 1 mM sodium pyruvate, 25 mM HEPES, and 2 mM L-glutamine) with 25 U/ml Benzonase B (Key Resource Table). Cell samples were added 1 mL of TCMB, centrifuged at 300g for 8min, resuspended in 5mL of TCMB and centrifuged again at 300g for 5min. Cell pellets were resuspended in TCMB at  $1-2 \times 10^6$  cells per 4mL of sample and incubated for 30min at 37 °C. Samples were then washed by adding 1-2mL of cell staining media (SM: phosphate buffered saline (PBS) + 1% bovine serum albumin (BSA)) and centrifuged at 300g for 5min. Cell pellets were resuspended in 25µL Fc-receptor block (Reagent Table) diluted to 1/20 in SM and pre-incubated at room temperature for 10 minutes prior to adding 25µL of the metal-tagged antibody cocktail. After an additional 30min at room temperature, cells were pelleted at 300g for 5min at 4°C, and washed twice with 2mL PBS at 300g for 5min at 4 °C before staining with 1µM Cisplatin for 5min at room temperature. Cisplatin was quenched with 2mL SM. Samples were underlay with calf serum, pelleted for 5 min at 300g, aspirated, and flicked to re-suspend. Cellular DNA was then labelled with 1 mL of 100 nM <sup>191/193</sup> Iridium in PBS containing 0.3% saponin and 1.6% formaldehyde overnight at 4 °C. On the following day, samples were washed in 4 volumes SM and pelleted at 800 x g at 4° C for 5 min. Cells were washed twice more with PBS and pelleted under the same conditions before re-suspending in Maxpar Cell Acquisition Solution (Reagent Table) at  $2-5 \times 10^5$ /ml containing four-element EQ normalization beads (Reagent Table) according to the manufacturer's instructions. Personnel at the SickKids' Centre for Advanced Single Cell Analysis (CASCA) analyzed the samples on a Helios3 instrument equipped with a wide-bore injector at ~300 cells/second according to Standard BioTools'

protocols. The Helios software (v7.0.8493) generated integrated mass data files that were normalized and converted to FCS 3.0 datafiles for downstream analysis.

#### *Gut microbiome data pre-processing and analyses*

All analyses in the manuscript, unless indicated otherwise, were completed in R v3.6.2 and v4.1.2<sup>14</sup>. Filtering and visualization of the ASVs at different taxonomic levels, as well as calculation of alpha diversity were completed using phyloseq v1.30.0<sup>15</sup>. Overall, 2749 unique ASVs were detected when accounting for sequenced amplicon error using R package dada2 v1.14.0<sup>5</sup>. After applying filters of > 0.1 prevalence and > 0.0005 of mean relative abundance, 199 ASVs were used as the core microbiome for distance-based Redundancy Analysis<sup>16</sup>, completed using vegan v2.5-6<sup>17</sup> and microViz v 0.10.5<sup>18</sup>, and hierarchical clustering, completed using ComplexHeatmap v2.2.0<sup>19</sup> and dendextend v1.13.4<sup>20</sup>. The Bray-Curtis distance was calculated using vegan v2.5-6<sup>17</sup>. The permutational test for variable association with gut microbiome composition was completed using adonis2() from vegan v2.5-6<sup>17</sup>, setting *by* = "margin" to perform separate significance test for each marginal term in a model with all other terms.

#### *Absolute quantification of gut bacteria and stool water content*

Frozen fecal samples were aliquoted, weighted, and normalized to 0.2g of wet feces per mL of 0.22µm-filtered Bacteria Staining Media (BSM, 1 mM EDTA, 0.05% Tween-20 in sterile PBS). After incubating for 15-30 minutes at room temperature, samples were homogenized by vortexing (1-5 min). To remove debris and large cells, samples were centrifuged at 700g for 1 min twice, and the fecal supernatant was collected. Next, 100ul of the fecal supernatant (equivalent to 20ug of wet stool) was washed with 1mL of BSM and centrifuged at 6000g for 4

min to recover bacterial cells. Pellets were washed once with 1mL of staining buffer and resuspended in the original volume (100ul). Bacterial cell suspensions were diluted 1/200 and 1/2000 in the staining buffer, and the diluted suspension was stained with Thiazole Orange (final concentration 420nM ; Anaspec) and Propidium Iodide (final concentration 20uM ; Sigma-Aldrich) for 15 min at room temperature. A known concentration of counting beads ( $\sim 10^5$  beads, AccuCount beads, Spherotech) was added to the stained cells, and the total number of nucleic acid-positive cells was counted by flow cytometry on an LSRFortessa flow cytometer (BD Biosciences, SickKids Flow cytometry facility) according to the manufacturer's instructions. Bacteria enumeration by flow cytometry was acquired in the BD FACSDiva™ software. A threshold value of 400-800 was applied on the side scatter V405 channel, with the stopping gate set to 6000 beads.

Stool water content was determined from frozen stool aliquots (0.1-0.2 g) as the ratio of mass loss (wet weight/dry weight) after air drying over 48h at room temperature in a Hamilton SafeAire II fume hood (Thermo Scientific). The wet/dry weight ratio represents the stool water content of each sample. We used the calculated wet/dry weight ratio to normalize the microbial cell counts assessed by flow cytometry (in 20ug of wet stool) to bacterial cell counts in one gram of dry stool. The absolute abundance of each ASV identified by 16S rRNA gene sequencing was determined by multiplying the relative abundance of each ASV by the total bacterial biomass normalized by one gram of dry stool.

### *CytoTOF Data Analysis*

FCS 3.0 datafiles were uploaded to CytoBank (Enterprise v10.4, Beckman Coulter Life Sciences) where all pre-processing steps were implemented. Data were pre-processed by arcsinh

transformation (cofactor = 5), with the minimum and maximum values for some markers being further adjusted to improve visualization. Standard pre-gating steps were then used to identify cell events as ( $^{140}\text{Ce}$  EQ $^-$  DNA1 $^{\text{all}}$ ), exclude aggregates and 195Cisplatin $^{\text{hi}}$  dead cells<sup>21</sup>. This population was further cleaned by removing CD3 $^+$ CD14 $^+$ , CD3 $^+$ CD19 $^+$ , CD19 $^+$ CD7 $^+$ , or CD19 $^+$ CD14 $^+$  aggregates. Within the resulting live single cell “clean” population, low-density (LD) CD45 $^{\text{lo}}$  CD66b $^+$  neutrophils were distinguished from the CD45 $^{\text{hi}}$  CD66b $^-$  population which was further gated to identify the following subsets: TCR $\alpha\beta$  (CD3 $^+$  TCRgd $^-$ ), TCR $\gamma\delta$  (CD3 $^+$  TCRgd $^+$ ), B cells were identified as CD3 $^-$ CD14 $^-$ CD19 $^+$  cells, natural killer cells (NK)+innate lymphoid cells (ILC) were identified as CD3 $^-$ CD19 $^-$ CD14 $^{\text{all}}$  HLA-DR $^-$ CD7 $^+$  cells, and myeloid cells were identified as CD3 $^-$ CD19 $^-$ CD14 $^{\text{all}}$  HLA-DR $^+$ CD7 $^-$  cells. Among TCRab cells, different lineages were identified as CD4 $^+$ , CD8a $^+$ , double negative (CD4 $^-$  CD8a $^-$ ), and mucosal-associated invariant T cells (MAIT) cells (TCRVa7.2 $^+$  CD161 $^+$ ), with CD4 and CD8 separated into naïve (CD45RO $^-$ CD7 $^{\text{all}}$ ) and memory (CD45RO $^+$ CD7 $^{\text{all}}$ ) cells. B cells were separated based on receptor isotype into unswitched IgM $^{\text{hi}}$  B cells, unswitched IgD $^{\text{hi}}$  B cells, and switched IgM $^-$  IgD $^-$  B cells. Among myeloid cells, plasmacytoid dendritic cells (pDC) were identified as CD11c $^-$  CD14 $^-$  CD123 $^+$  CD38 $^+$  cells, and HLA-DR $^+$ CD11c $^+$  population is further separated into classical monocytes (CD14 $^+$  CD16 $^-$ ), non-classical monocytes (CD14 $^-$  CD16 $^+$ ), and classical dendritic cells (CD11b $^-$  CD35 $^-$  HLA-DR $^{\text{hi}}$ CD38 $^+$ ), of which conventional dendritic cells 1(cDC1) are marked by CD141, and conventional dendritic cells 2 (cDC2) are marked by CD1c. NK/ILC subsets were defined based on CD56 and CD16. The frequencies of all cell subsets in low and high biomass group were compared by permutation test using *compare.2.vectors()* function from *afex* package<sup>22</sup>, visualized in dot plots, and corrected for multiple testing using *p.adjust()* in *stats* package<sup>14</sup>. We performed UMAP<sup>23</sup> dimensionality reduction in CytoBank by equal



downsampling to 46213 events/sample (set to 10 neighbors, min distance 0.4). One sample was excluded due to low cell count (n = 23224).

### *Handling Missing Data and Normalization*

Missing data in clinical measurements was imputed using multivariate imputation by chained equations (MICE) v3.16.0<sup>24</sup>. Continuous variables were transformed into a standard normal distribution based on center, scale, and Yeo-Johnson transformation using caret v6.0-85<sup>25</sup>.

### *Statistical analysis*

Unless otherwise specified, the associations between fecal bacteria counts, taxa abundances, cardiometabolic measures, plasma neutrophil proteins, and other variables were evaluated by linear regression using `lm()` in the base R stats package<sup>14</sup>. Permutation tests were used to evaluate differentially abundant ASVs and immune cell populations with `afex` v1.3-0<sup>22</sup>. Multiple testing correction was completed using `p.adjust()` in stats package<sup>14</sup>. Multinomial logistic regression from `nnet` v7.3-12 was used to predict probability of cluster assignment based on normalized fecal bacteria counts<sup>26</sup>. Gamma generalized linear regression with log-link function using `glm()` in stats was used to evaluate the association between *Escherichia* abundance and fecal and plasma calprotectin. ESEM of the relationships between three latent variables -- the gut microbiota, inflammation, and metabolic variation -- and various observed variables was completed in `lavaan`<sup>27</sup>. All regressions were adjusted for age, sex and BMI. All visualization and analysis are completed with `tidyverse` v1.3.0<sup>28</sup>.

### Reagent table

| REAGENT or RESOURCE                                     | SOURCE            | IDENTIFIER                        |
|---------------------------------------------------------|-------------------|-----------------------------------|
| Antibodies                                              |                   |                                   |
| Mouse monoclonal anti-CD45 <sup>89</sup> Y (clone HI30) | Standard BioTools | Cat#3089003B;<br>RRID: AB_2938863 |

|                                                                |                                                            |                                                                  |
|----------------------------------------------------------------|------------------------------------------------------------|------------------------------------------------------------------|
| Mouse monoclonal anti-CD38 <sup>114</sup> Cd (clone HB7)       | Biolegend, conjugated in house with <sup>114</sup> Cd      | MaxPar ready custom formulation of Cat# 356602; RRID: AB_2561794 |
| Mouse monoclonal anti-CD11c <sup>115</sup> In (clone Bu15)     | Biolegend, conjugated in house with <sup>115</sup> In      | Cat# 337221; RRID: AB_2562834                                    |
| Mouse monoclonal anti-HLA-DR <sup>141</sup> Pr (clone L243)    | Biolegend, conjugated in house with <sup>141</sup> Pr      | Cat# 307651; RRID: AB_2562826                                    |
| Mouse monoclonal anti-IgD <sup>142</sup> Nd (clone IA6-2)      | Biolegend, conjugated in house with <sup>142</sup> Nd      | Cat# 348235; RRID: AB_2563775                                    |
| Mouse monoclonal anti-CD27 <sup>144</sup> Nd (clone L128)      | BD Biosciences, conjugated in house with <sup>144</sup> Nd | Custom order of purified anti-human CD27 from BD Biosciences     |
| Mouse monoclonal anti-CD8a <sup>146</sup> Nd (clone RPA-T8)    | Biolegend, conjugated in house <sup>146</sup> Nd           | Cat# 301002; RRID: AB_314120                                     |
| Mouse monoclonal anti-CD35 <sup>147</sup> Sm (clone E11)       | Biolegend, conjugated in house with <sup>147</sup> Sm      | Cat# 333402; RRID: AB_1089032                                    |
| Mouse monoclonal anti-CD4 <sup>148</sup> Nd (clone SK3)        | Biolegend, conjugated in house with <sup>148</sup> Nd      | Cat# 344625; RRID: AB_2563749                                    |
| Mouse monoclonal anti-CD24 <sup>150</sup> Nd (clone ML5)       | Biolegend, conjugated in house with <sup>150</sup> Nd      | Cat# 311127; RRID: AB_2563733                                    |
| Mouse monoclonal anti-CD123 <sup>151</sup> Eu (clone 6H6)      | Biolegend, conjugated in house with <sup>151</sup> Eu      | Cat# 306027; RRID: AB_2562823                                    |
| Mouse monoclonal anti-CD7 <sup>152</sup> Sm (clone CD7-6B7)    | Biolegend, conjugated in house with <sup>152</sup> Sm      | Cat# 343111; RRID: AB_2563761                                    |
| Mouse monoclonal anti-CD45RA <sup>153</sup> Eu (clone HI100)   | Biolegend, conjugated in house with <sup>153</sup> Eu      | Cat# 304102; RRID: AB_314406                                     |
| Mouse monoclonal anti-CD161 <sup>155</sup> Gd (clone HP-3G10)  | Biolegend, conjugated in house with <sup>155</sup> Gd      | Cat# 339919; RRID: AB_2562836                                    |
| Mouse monoclonal anti-CD138 <sup>158</sup> Gd (clone MI15)     | Biolegend, conjugated in house with <sup>158</sup> Gd      | MaxPar ready custom formulation of Cat# 356502; RRID: AB_2561790 |
| Mouse monoclonal anti-IgM <sup>159</sup> Tb (clone MHM-88)     | Biolegend, conjugated in house with <sup>159</sup> Tb      | Cat# 314527; RRID: AB_2563776                                    |
| Mouse monoclonal anti-CD14 <sup>160</sup> Gd (clone M5E2)      | Biolegend, conjugated in house with <sup>160</sup> Gd      | Cat# 301802; RRID: AB_314184                                     |
| Mouse monoclonal anti-CD25 <sup>161</sup> Dy (clone 2A3)       | BD Biosciences, conjugated in house with <sup>161</sup> Dy | MaxPar ready custom formulation of Cat# 347640; RRID: AB_400333  |
| Mouse monoclonal anti-CD1c <sup>162</sup> Dy (clone L161)      | Biolegend, conjugated in house with <sup>162</sup> Dy      | MaxPar ready custom formulation of Cat# 331502; RRID: AB_1088995 |
| Mouse monoclonal anti-CD127 <sup>163</sup> Dy (clone eBioRDR5) | eBioscience, conjugated in house with <sup>163</sup> Dy    | Cat# 14-1278-82; RRID: AB_657591                                 |
| Mouse monoclonal anti-CD279 <sup>164</sup> Dy (clone EH12.1)   | BD Biosciences, conjugated in house with <sup>164</sup> Dy | Cat# 562138; RRID: AB_10897007                                   |
| Mouse monoclonal anti-CD16 <sup>165</sup> Ho (clone 3G8)       | Biolegend, conjugated in house with <sup>165</sup> Ho      | Cat# 302002; RRID: AB_314202                                     |

|                                                                |                                                               |                                                                  |
|----------------------------------------------------------------|---------------------------------------------------------------|------------------------------------------------------------------|
| Rat monoclonal anti-CXCR5 <sup>166</sup> Er (clone RF8B2)      | BD Biosciences, conjugated in house with <sup>166</sup> Er    | Cat# 552032, RRID: AB_394324                                     |
| Mouse monoclonal anti-TCR-Va7.2 <sup>167</sup> Er (clone 3C10) | Biolegend, conjugated in house with <sup>167</sup> Er         | Cat# 351702, RRID: AB_10900258                                   |
| Mouse monoclonal anti-CD19 <sup>168</sup> Er (clone HIB19)     | Biolegend, conjugated in house with <sup>168</sup> Er         | Cat# 302247, RRID: AB_2562815                                    |
| Mouse monoclonal anti-CD66b <sup>169</sup> Tm (clone G10F5)    | BD Biosciences, conjugated in house with <sup>169</sup> Tm    | MaxPar ready custom formulation of Cat# 555723; RRID: AB_39606   |
| Mouse monoclonal anti-CD3 <sup>170</sup> Er (clone UCHT1)      | eBioscience, conjugated in house with <sup>170</sup> Er       | Cat# 16-0038-85, RRID: AB_468857                                 |
| Mouse monoclonal anti-CD141 <sup>171</sup> Yb (clone 1A4)      | BD Biosciences, conjugated in house with <sup>171</sup> Yb    | MaxPar ready custom formulation of Cat# 559780; RRID: AB_397321  |
| Mouse monoclonal anti-TCRgd <sup>172</sup> Yb (clone 5A6.E9)   | Purified from hybridoma in house                              |                                                                  |
| Mouse monoclonal anti-CD56 <sup>173</sup> Yb (clone REA196)    | Miltenyi Biotec, conjugated in house with <sup>173</sup> Yb   | Cat# 130-108-016, RRID: AB_2658728                               |
| Mouse monoclonal anti-CD45RO <sup>174</sup> Yb (clone UCHL1)   | Biolegend, conjugated in house with <sup>174</sup> Yb         | Cat# 304202, RRID: AB_314418                                     |
| Mouse monoclonal anti-CD163 <sup>175</sup> Lu (clone GHI/61)   | Biolegend, conjugated in house with <sup>175</sup> Lu         | MaxPar ready custom formulation of Cat# 333602, RRID: AB_1088991 |
| Mouse monoclonal anti-CCR7 <sup>176</sup> Yb (clone G043H7)    | Biolegend, conjugated in house with <sup>176</sup> Yb         | Cat# 353237, RRID: AB_2563726                                    |
| Mouse monoclonal anti-CD11b <sup>209</sup> Bi (clone ICRF44)   | Standard BioTools, conjugated in house with <sup>209</sup> Bi | Cat# 3209003B, RRID: AB_2687654                                  |
| Cisplatin 1g                                                   | BioVision Research Products                                   | 1550-1000                                                        |
| Cell-ID™ Intercalator-Ir (500uM)                               | Standard BioTools                                             | 201192B                                                          |
| Biological samples                                             |                                                               |                                                                  |
| Stool                                                          | Hospital for Sick Children                                    | NCT04031222                                                      |
| PBMC                                                           | Hospital for Sick Children                                    | NCT04031222                                                      |
| Plasma                                                         | Hospital for Sick Children                                    | NCT04031222                                                      |
| Chemicals, peptides, and recombinant proteins                  |                                                               |                                                                  |
| Ficoll-Paque PLUS, 6x100ml/pack                                | Cytiva                                                        | CA95021-205L                                                     |
| Thiozole Orange, 10 mM in DMSO, UltraPure Grade                | Anaspec                                                       | AS-83228                                                         |
| Propidium iodide, ≥95% HPLC, 100mg                             | Sigma-Aldrich                                                 | P4170                                                            |
| Trypan Blue solution                                           | Sigma-Aldrich                                                 | T8154                                                            |
| DMSO, Hybri-Max™, sterile-filtered, ≥ 99.7%, 100mL             | Sigma-Aldrich                                                 | D2650                                                            |
| RPMI-1640 with GlutaMAX                                        | Life Technologies                                             | 61870-127                                                        |
| Fetal Bovine Serum                                             | Wisent                                                        | 080-150                                                          |
| MEM Non-Essential Amino Acids Solution (100X)                  | Life Technologies                                             | 11140-050                                                        |

|                                                                                  |                                                           |                                                                                                       |
|----------------------------------------------------------------------------------|-----------------------------------------------------------|-------------------------------------------------------------------------------------------------------|
| Sodium Pyruvate (100 mM)                                                         | Life Technologies                                         | 11360-070                                                                                             |
| HEPES, Free Acid 100g                                                            | Wisent                                                    | 600-032 EG                                                                                            |
| L-Glutamine (200mM)                                                              | Life Technologies                                         | 25030-081                                                                                             |
| Benzonase® Nuclease, UltraPure                                                   | Sigma-Aldrich                                             | E1014-25KU                                                                                            |
| Phosphate-buffered saline (PBS), Ca <sup>2+</sup> /Mg <sup>2+</sup> free, pH 7.2 | Gibco                                                     | 20012-050                                                                                             |
| Bovine serum albumin (BSA), Cohn Fraction V, ≥98%                                | Sigma-Aldrich                                             | A7906                                                                                                 |
| Human TruStain FcX™                                                              | BioLegend                                                 | 422302                                                                                                |
| Saponin                                                                          | Sigma-Aldrich                                             | S7900                                                                                                 |
| Formaldehyde, 16%, methanol free, UltraPure                                      | Polysciences                                              | 18814-20                                                                                              |
| EDTA (0.5 M), pH 8.0, RNase-free                                                 | Invitrogen                                                | AM9261                                                                                                |
| TWEEN® 20                                                                        | Sigma-Aldrich                                             | P5927                                                                                                 |
| Maxpar Cell Acquisition Solution—200 mL                                          | Standard BioTools                                         | 201241                                                                                                |
| EQ™ Four Element Calibration Beads—100 mL                                        | Standard BioTools                                         | 201078                                                                                                |
| AccuCount Blank Particles                                                        | Spherotech                                                | ACBP-50-10                                                                                            |
| Critical commercial assays                                                       |                                                           |                                                                                                       |
| QIAamp DNA Stool Mini Kit                                                        | QIAGEN                                                    | 51504                                                                                                 |
| MiSeq Reagent Kit v3 (600-cycle)                                                 | Illumina                                                  | MS-102-3003                                                                                           |
| Maxpar® X8 Antibody Labeling Kits                                                | Standard BioTools                                         | 201142                                                                                                |
| Cell Viability Kit                                                               | BD Biosciences                                            | 349483                                                                                                |
| Human S100A8/S100A9 Heterodimer DuoSet ELISA                                     | R&D Systems                                               | DY8226-05                                                                                             |
| Human Neutrophil Elastase/ELA2 DuoSet ELISA                                      | R&D Systems                                               | DY9167-05                                                                                             |
| Human Myeloperoxidase DuoSet ELISA                                               | R&D Systems                                               | DY3174                                                                                                |
| Human CD14 DuoSet ELISA                                                          | R&D Systems                                               | DY383-05                                                                                              |
| Human LBP DuoSet ELISA                                                           | R&D Systems                                               | DY870-05                                                                                              |
| DuoSet ELISA Ancillary Reagent Kit 2                                             | R&D Systems                                               | DY008B                                                                                                |
| Deposited data                                                                   |                                                           |                                                                                                       |
| SILVA v138.1 rRNA database                                                       | Quast et al. <sup>6</sup> and McLaren et al. <sup>7</sup> | 10.5281/zenodo.4587954                                                                                |
|                                                                                  |                                                           |                                                                                                       |
|                                                                                  |                                                           |                                                                                                       |
|                                                                                  |                                                           |                                                                                                       |
|                                                                                  |                                                           |                                                                                                       |
| Primers                                                                          |                                                           |                                                                                                       |
| 16S rRNA-Forward Primer 338F:<br>CCTACGGGAGGCAGCAG                               | Hara et al. <sup>4</sup>                                  | 10.4049/jimmunol.1201257                                                                              |
| 16S rRNA-Reverse Primer 806R:<br>CTACHVGGGTWTCTAAT                               | Hara et al. <sup>4</sup>                                  | 10.4049/jimmunol.1201257                                                                              |
| Software and algorithms                                                          |                                                           |                                                                                                       |
| R and stats v 3.6.2 and 4.1.2                                                    | R Core Team <sup>14</sup>                                 | <a href="https://www.R-project.org">https://www.R-project.org</a>                                     |
| dada2 v 1.14.0                                                                   | Callahan et al. <sup>5</sup>                              | <a href="https://benjjneb.github.io/dada2/index.html">https://benjjneb.github.io/dada2/index.html</a> |
| FACSDiva v8.0.1                                                                  | BD Biosciences                                            |                                                                                                       |

|                             |                                                                     |                                                                                                                                                         |
|-----------------------------|---------------------------------------------------------------------|---------------------------------------------------------------------------------------------------------------------------------------------------------|
| Cytobank Enterprise version | Beckman Coulter                                                     | <a href="https://www.mybeckman.ca/flow-cytometry/software/cytobank-enterprise">https://www.mybeckman.ca/flow-cytometry/software/cytobank-enterprise</a> |
| phyloseq v 1.30.0           | Paul J. McMurdie and Susan Holmes <sup>15</sup>                     | <a href="http://dx.plos.org/10.1371/journal.pone.0061217">http://dx.plos.org/10.1371/journal.pone.0061217</a>                                           |
| microViz v 0.10.5           | David J.M. Barnett and Ilja C.W. Arts and John Pender <sup>18</sup> | <a href="https://doi.org/10.21105/joss.03201">https://doi.org/10.21105/joss.03201</a>                                                                   |
| tidyverse v 1.3.0           | Wickham et al. <sup>28</sup>                                        | <a href="https://doi.org/10.21105/joss.01686">https://doi.org/10.21105/joss.01686</a>                                                                   |
| ComplexHeatmap v 2.2.0      | Zuguang Gu and Roland Eils and Matthias Schlesner <sup>19</sup>     | 10.1093/bioinformatics/btw313                                                                                                                           |
| dendextend v 1.13.4         | Tal Galili <sup>20</sup>                                            | 10.1093/bioinformatics/btv428                                                                                                                           |
| vegan v 2.5-6               | Dixon <sup>17</sup>                                                 | <a href="https://CRAN.R-project.org/package=vegan">https://CRAN.R-project.org/package=vegan</a>                                                         |
| mice v3.16.0                | Stef van Buuren and Karin Groothuis-Oudshoorn <sup>24</sup>         | 10.18637/jss.v045.i03                                                                                                                                   |
| caret v6.0-85               | Max Kuhn <sup>25</sup>                                              | <a href="https://CRAN.R-project.org/package=caret">https://CRAN.R-project.org/package=caret</a>                                                         |
| afex v 1.3-0                | Singmann et al. <sup>22</sup>                                       | <a href="https://CRAN.R-project.org/package=afex">https://CRAN.R-project.org/package=afex</a>                                                           |
| nnet v 7.3-12               | W. N. Venables and B. D. Ripley <sup>26</sup>                       | <a href="http://www.stats.ox.ac.uk/pub/MASS4">http://www.stats.ox.ac.uk/pub/MASS4</a>                                                                   |
| lavaan v 0.6-17             | Yves Rosseel <sup>27</sup>                                          | 10.18637/jss.v048.i02                                                                                                                                   |
|                             |                                                                     |                                                                                                                                                         |

## Supplemental references

1. World Health Organization. Growth reference 5-19 years - BMI-for-age (5-19 years). 2007. <https://www.who.int/tools/growth-reference-data-for-5to19-years/indicators/bmi-for-age>
2. World Health Organization. ANNEX H, SEXUAL MATURITY RATING (TANNER STAGING) IN ADOLESCENTS. In: Antiretroviral Therapy for HIV Infection in Infants and Children: Towards Universal Access: Recommendations for a Public Health Approach: 2010 Revision. Geneva: World Health Organization; 2010. (WHO Guidelines Approved by the Guidelines Review Committee). <https://www.ncbi.nlm.nih.gov/books/NBK138588/>
3. Retnakaran R, Qi Y, Goran MI, Hamilton JK. Evaluation of proposed oral disposition index measures in relation to the actual disposition index. *Diabetic Medicine*. 2009;26(12):1198–1203. doi:10.1111/j.1464-5491.2009.02841.x
4. Hara N, Alkanani AK, Ir D, Robertson CE, Wagner BD, Frank DN, Zipris D. Prevention of Virus-Induced Type 1 Diabetes with Antibiotic Therapy. *The Journal of Immunology*. 2012;189(8):3805–3814. doi:10.4049/jimmunol.1201257
5. Callahan BJ, McMurdie PJ, Rosen MJ, Han AW, Johnson AJA, Holmes SP. DADA2: High-resolution sample inference from Illumina amplicon data. *Nature Methods*. 2016;13(7):581–583. doi:10.1038/nmeth.3869
6. Quast C, Pruesse E, Yilmaz P, Gerken J, Schweer T, Yarza P, Peplies J, Glöckner FO. The SILVA ribosomal RNA gene database project: improved data processing and web-based tools. *Nucleic Acids Research*. 2012;41(D1):D590–D596. doi:10.1093/nar/gks1219
7. McLaren MR, Callahan BJ. Silva 138.1 prokaryotic SSU taxonomic training data formatted for DADA2. 2021 [accessed 2024 May 28]. <https://zenodo.org/record/4587955>. doi:10.5281/ZENODO.4587955
8. Oren A, Garrity GM. Valid publication of the names of forty-two phyla of prokaryotes. *International Journal of Systematic and Evolutionary Microbiology*. 2021 [accessed 2024 Aug 1];71(10). <https://www.microbiologyresearch.org/content/journal/ijsem/10.1099/ijsem.0.005056>. doi:10.1099/ijsem.0.005056
9. Parte AC, Sardà Carbasse J, Meier-Kolthoff JP, Reimer LC, Göker M. List of Prokaryotic names with Standing in Nomenclature (LPSN) moves to the DSMZ. *International Journal of Systematic and Evolutionary Microbiology*. 2020;70(11):5607–5612. doi:10.1099/ijsem.0.004332
10. Chattaway MA, Schaefer U, Tewolde R, Dallman TJ, Jenkins C. Identification of *Escherichia coli* and *Shigella* Species from Whole-Genome Sequences Ledebauer NA, editor. *Journal of Clinical Microbiology*. 2017;55(2):616–623. doi:10.1128/JCM.01790-16

11. Devanga Ragupathi NK, Muthuirulandi Sethuvel DP, Inbanathan FY, Veeraraghavan B. Accurate differentiation of *Escherichia coli* and *Shigella* serogroups: challenges and strategies. *New Microbes and New Infections*. 2018;21:58–62. doi:10.1016/j.nmni.2017.09.003
12. Gianetto-Hill CM, Vancuren SJ, Daisley B, Renwick S, Wilde J, Schroeter K, Daigneault MC, Allen-Vercoe E. The Robogut: A Bioreactor Model of the Human Colon for Evaluation of Gut Microbial Community Ecology and Function. *Current Protocols*. 2023;3(4):e737. doi:10.1002/cpz1.737
13. Granato A, Renwick S, Yau C, Kong T, Daigneault MC, Knip M, DIABIMMUNE Study Group, Allen-Vercoe E, Danska JS. Analysis of early childhood intestinal microbial dynamics in a continuous-flow bioreactor. *Microbiome*. 2024;12(1):255. doi:10.1186/s40168-024-01976-w
14. R Core Team. R: A language and environment for statistical computing. 2019. <https://www.R-project.org/>
15. McMurdie PJ, Holmes S. phyloseq: An R Package for Reproducible Interactive Analysis and Graphics of Microbiome Census Data Watson M, editor. *PLoS ONE*. 2013;8(4):e61217. doi:10.1371/journal.pone.0061217
16. Legendre P, Anderson MJ. Distance-Based Redundancy Analysis: Testing Multispecies Responses in Multifactorial Ecological Experiments. *Ecological Monographs*. 1999;69(1):1–24. doi:10.1890/0012-9615(1999)069[0001:DBRATM]2.0.CO;2
17. Dixon P. VEGAN, a package of R functions for community ecology. *Journal of Vegetation Science*. 2003;14(6):927–930. doi:10.1111/j.1654-1103.2003.tb02228.x
18. Barnett D, Arts I, Penders J. microViz: an R package for microbiome data visualization and statistics. *Journal of Open Source Software*. 2021;6(63):3201. doi:10.21105/joss.03201
19. Gu Z, Eils R, Schlesner M. Complex heatmaps reveal patterns and correlations in multidimensional genomic data. *Bioinformatics*. 2016;32(18):2847–2849. doi:10.1093/bioinformatics/btw313
20. Galili T. dendextend: an R package for visualizing, adjusting and comparing trees of hierarchical clustering. *Bioinformatics*. 2015;31(22):3718–3720. doi:10.1093/bioinformatics/btv428
21. Bagwell CB, Inokuma M, Hunsberger B, Herbert D, Bray C, Hill B, Stelzer G, Li S, Kollipara A, Ornatsky O, et al. Automated Data Cleanup for Mass Cytometry. *Cytometry Part A*. 2020;97(2):184–198. doi:10.1002/cyto.a.23926
22. Singmann H, Bolker B, Westfall J, Aust F, Ben-Shachar MS. afex: Analysis of Factorial Experiments. 2023. <https://CRAN.R-project.org/package=afex>

23. McInnes L, Healy J, Melville J. UMAP: Uniform Manifold Approximation and Projection for Dimension Reduction. 2018 [accessed 2024 Jun 1]. <https://arxiv.org/abs/1802.03426>. doi:10.48550/ARXIV.1802.03426

24. Buuren SV, Groothuis-Oudshoorn K. mice : Multivariate Imputation by Chained Equations in R. *Journal of Statistical Software*. 2011 [accessed 2024 May 28];45(3). <http://www.jstatsoft.org/v45/i03/>. doi:10.18637/jss.v045.i03

25. Kuhn M. caret: Classification and Regression Training. *Astrophysics Source Code Library*. 2015 May 1:ascl:1505.003.

26. Venables WN, Ripley BD. *Modern applied statistics with S*. 4th ed. New York: Springer; 2002. (Statistics and computing).

27. Rosseel Y. lavaan: An R Package for Structural Equation Modeling. *Journal of Statistical Software*. 2012 [accessed 2024 May 28];48(2). <http://www.jstatsoft.org/v48/i02/>. doi:10.18637/jss.v048.i02

28. Wickham H, Averick M, Bryan J, Chang W, McGowan L, François R, Golemund G, Hayes A, Henry L, Hester J, et al. Welcome to the Tidyverse. *Journal of Open Source Software*. 2019;4(43):1686. doi:10.21105/joss.01686
